# Supplementary material
Source: MDPI journal article supplement (https://www.mdpi.com/2036-7503/14/4/48)
Supplement: s1 [file s1]

## Supplementary Material

**Table S1.** List of the 110 case reports which have been analysed and extracted information.

| Author                   | Patient's age (years) | Patient's gender | Vaccine type   | Vaccine dose | Number of days between vaccine administration and onset of symptoms | Disease         | Symptoms                    | ECG on admission                           | Troponin     | Imaging                    | Biopsy   | Outcome             |
|--------------------------|-----------------------|------------------|----------------|--------------|---------------------------------------------------------------------|-----------------|-----------------------------|--------------------------------------------|--------------|----------------------------|----------|---------------------|
| Walters CG, et al [43]   | 29                    | Male             | Pfizer-BioNTec | Second       | 4                                                                   | Myopericarditis | Chest pain                  | Diffuse ST segment elevation               | Increased    | Echo (EF 60%)              | Not done | Complete resolution |
| Fritz RO, et al [44]     | In his 20s            | Male             | Pfizer-BioNTec | Third        | 3                                                                   | Myopericarditis | Chest pain                  | PR tract sloping and ST elevation in V1-V3 | Increased    | Echo (depressed EF), c-MRI | Not done | Complete resolution |
| Ehldouheri E, et al [45] | 30                    | Male             | Pfizer-BioNTec | Second       | 7                                                                   | Myopericarditis | Chest pain, dyspnoea, fever | Diffuse ST segment elevation               | Increased    | Echo (normal EF)           | Not done | Complete resolution |
| Javed A, et al [46]      | 64                    | Male             | Moderna        | Second       | 7                                                                   | Pericarditis    | Chest pain, dyspnoea        | Atrial flutter                             | Not checked  | Echo (normal EF), CT scan  | Not done | Complete resolution |
| Patel K, et al [47]      | 57                    | Male             | Pfizer-BioNTec | Second       | 7                                                                   | Pericarditis    | Dyspnoea, fever, chills     | Normal morphology                          | Normal       | Echo (normal EF), CT scan  | Not done | Complete resolution |
| Generette GS, et al [48] | 74                    | Male             | Pfizer-BioNTec | Second       | 14                                                                  | Myopericarditis | Chest pain, fever           | Atrial fibrillation                        | Normal       | Echo (EF not reported)     | Not done | Complete resolution |
| Mizoguchi T, et al [49]  | 88                    | Female           | Pfizer-BioNTec | Second       | 3                                                                   | Pericarditis    | Chest pain, dyspnoea        | PR tract depression                        | Normal       | Echo (normal EF), CT scan  | Not done | Complete resolution |
| Morton Z, et al [50]     | 16                    | Male             | Pfizer-BioNTec | Second       | 2                                                                   | Myopericarditis | Chest pain, fever           | Diffuse ST segment elevation               | Increased    | Echo (normal EF)           | Not done | Complete resolution |
| Park S, et al [51]       | 17                    | Male             | Pfizer-BioNTec | First        | 18                                                                  | Myocarditis     | Chest pain                  | Diffuse ST segment elevation               | Increased    | Echo (normal EF), c-MRI    | Not done | Complete resolution |
| Perna F, et al [52]      | 30                    | Male             | Pfizer-BioNTec | Second       | 5                                                                   | Pericarditis    | Chest pain                  | Diffuse ST segment elevation               | Not measured | Echo (normal EF)           | Not done | Complete resolution |

|                                 |    |        |                                           |        |         |                 |                                                        |                                                      |              |                                          |                        |                           |
|---------------------------------|----|--------|-------------------------------------------|--------|---------|-----------------|--------------------------------------------------------|------------------------------------------------------|--------------|------------------------------------------|------------------------|---------------------------|
|                                 |    |        |                                           |        |         |                 |                                                        | and PR depression                                    |              |                                          |                        |                           |
| Sharbatban A, et al <b>[53]</b> | 25 | Male   | Moderna                                   | Second | 3       | Myopericarditis | Chest pain, fatigue                                    | Diffuse ST segment elevation                         | Increased    | Echo (normal EF)                         | Not done               | Complete resolution       |
| Misumi I, et al <b>[54]</b>     | 59 | Male   | Pfizer-BioNTec                            | First  | 7       | Pericarditis    | Dyspnoea, leg oedema                                   | Poor R wave progression in the precordial leads      | Not measured | Echo (normal EF)                         | Not done               | Constrictive pericarditis |
| Kim SH, et al <b>[55]</b>       | 63 | Female | Astrazeneca                               | Second | 3 hours | Myocarditis     | Chest pain, dizziness                                  | Abnormal (no other specifications)                   | Increased    | Echo (EF 15%)                            | Done post-explantation | Heart transplant          |
| Gill J, et al <b>[56]</b>       | 44 | Male   | Moderna                                   | Second | 4       | Myopericarditis | Chest pain, dyspnoea                                   | Normal                                               | Increased    | Echo (normal EF), c-MRI                  | Not done               | Complete resolution       |
| Fadah K, et al <b>[57]</b>      | 18 | Male   | Moderna                                   | First  | 3       | Myopericarditis | Chest pain                                             | Diffuse ST segment elevation and PR tract depression | Increased    | Echo (borderline EF 50-55%)              | Not done               | Lost of follow-up         |
| Singh A, et al <b>[58]</b>      | 69 | Female | Moderna                                   | Second | 1       | Pericarditis    | Chest pain                                             | Diffuse ST segment elevation                         | Not tested   | Echo (normal EF), CT scan                | Not done               | Ongoing follow-up         |
| Viani GM, et al <b>[59]</b>     | 59 | Male   | Pfizer-BioNTec                            | Second | 5       | Pericarditis    | Chest pain                                             | Normal morphology                                    | Normal       | Echo (normal EF), c-MRI                  | Not done               | Ongoing follow-up         |
| Zaki HA, et al <b>[60]</b>      | 55 | Female | Pfizer-BioNTec                            | Third  | 2       | Pericarditis    | Fever, chills, dry cough                               | Normal morphology                                    | Not tested   | Echo (normal EF), CT scan                | Not done               | Complete resolution       |
| Plüß M, et al <b>[61]</b>       | 67 | Female | Astrazeneca                               | First  | 14      | Pericarditis    | Fever, weakness, diffuse arthralgia                    | Not done                                             | Not tested   | Transoesophageal echo (normal EF), c-MRI | Not done               | Complete resolution       |
| Nakanishi Y, et al <b>[62]</b>  | 70 | Female | m-RNA vaccine (no further specifications) | Second | 7       | Pericarditis    | body weight gain, peripheral oedema, dyspnea on effort | Normal morphology                                    | Normal       | Echo (normal EF), CT scan                | Not done               | Complete resolution       |

|                                   |    |        |                |        |         |                 |                             |                                                      |            |                                     |          |                                         |
|-----------------------------------|----|--------|----------------|--------|---------|-----------------|-----------------------------|------------------------------------------------------|------------|-------------------------------------|----------|-----------------------------------------|
| Hryniewicki AT, et al <b>[63]</b> | 18 | Male   | Pfizer-BioNTec | First  | 21      | Pericarditis    | Chest pain, fever, dyspnoea | Diffuse ST segment elevation and PR tract depression | Not tested | Echo (normal EF)                    | Not done | Ongoing follow-up                       |
| Badshah M, et al <b>[64]</b>      | 22 | Female | Moderna        | Second | 1       | Myopericarditis | Chest pain                  | Normal morphology                                    | Increased  | Echo (EF 48%), c-MRI                | Not done | Ongoing follow-up                       |
| Ashaari S, et al <b>[65]</b>      | 66 | Male   | Pfizer-BioNTec | First  | 7       | Pericarditis    | Chest pain, dyspnoea        | Diffuse ST segment elevation                         | Increased  | ST segment elevation in leads V2-V4 | Not done | Complete resolution                     |
| Khogali F, et al <b>[66]</b>      | 29 | Female | Moderna        | Second | 10      | Perimyocarditis | Fever, fatigue              | Diffuse ST segment elevation                         | Increased  | Echo (EF 27%)                       | Not done | Complete resolution                     |
| Horiuchi K, et al <b>[67]</b>     | 32 | Male   | Moderna        | First  | 5       | Myocarditis     | Abdominal pain, fever       | ST segment elevation in leads D2, aVF, and V1-V3     | Increased  | Echo (EF 20%)                       | Yes      | Complete resolution                     |
| Hoshino N, et al <b>[68]</b>      | 27 | Male   | Moderna        | First  | 8       | Myocarditis     | Syncope                     | Asystole                                             | Not tested | Echo (EF 25%)                       | Yes      | Death                                   |
| Anthony JA, et al <b>[69]</b>     | 45 | Male   | Moderna        | Second | 3       | Myocarditis     | Chest pain                  | ST segment elevation in leads V2-V4                  | Increased  | Echo (EF 50%), c-MRI                | Not done | Residual chest discomfort and dizziness |
| Hirsch VG, et al <b>[70]</b>      | 32 | Male   | Pfizer-BioNTec | First  | 4       | Myocarditis     | Shortness of breath         | Right bundle branch block                            | Increased  | Echo (EF 47%), c-MRI                | Yes      | Reduced ventricular systolic function   |
| Etuk AS, et al <b>[71]</b>        | 18 | Male   | Moderna        | First  | 8 hours | Myocarditis     | Chest pain                  | ST segment elevation in lateral leads D1 and aVL     | Increased  | Echo (normal EF), c-MRI             | Not done | Complete resolution                     |
| Alizadeh LS, et al <b>[72]</b>    | 29 | Male   | Astrazeneca    | First  | 3       | Myocarditis     | Chest pain, fever           | ST segment elevation in postero-lateral leads        | Increased  | Echo (EF 44%), c-MRI                | Not done | Complete resolution                     |

|                                  |    |        |                |                        |    |                 |                                  |                                                  |           |                                     |          |                                            |
|----------------------------------|----|--------|----------------|------------------------|----|-----------------|----------------------------------|--------------------------------------------------|-----------|-------------------------------------|----------|--------------------------------------------|
| Khan MZ, et al <b>[73]</b>       | 22 | Male   | Moderna        | Second                 | 30 | Myocarditis     | Abdominal pain                   | Not reported                                     | Increased | Echo (EF 10%), c-MRI                | Not done | Right ventricular dysfunction on milrinone |
| Kawano H, et al <b>[74]</b>      | 60 | Female | Pfizer-BioNTec | Second                 | 24 | Myocarditis     | Fever                            | Q waves in inferior leads and V1-V3              | Increased | Echo (EF 23%), c-MRI                | Yes      | Complete resolution                        |
| Bae DH, et al <b>[75]</b>        | 38 | Female | Moderna        | First                  | 4  | Myocarditis     | Chest pain                       | ST segment elevation in leads V1-V3              | Increased | Echo (normal EF), c-MRI             | Yes      | Complete resolution                        |
| Kimura M, et al <b>[76]</b>      | 69 | Male   | Pfizer-BioNTec | Not reported (first ?) | 7  | Myocarditis     | Chills, peripheral coldness      | ST segment elevation in leads D2, D3, aVF, V1-V4 | Increased | Echo (severe global hypokinesia)    | Yes      | Complete resolution                        |
| Marsukjai A, et al <b>[77]</b>   | 55 | Female | Astrazeneca    | Second                 | 14 | Myocarditis     | Palpitations                     | Sinus tachycardia                                | Increased | Echo (normal EF), c-MRI             | Yes      | Complete resolution                        |
| Ansari U, et al <b>[78]</b>      | 23 | Male   | Moderna        | Second                 | 1  | Myocarditis     | Chest pain                       | ST segment elevation in leads D2, D3, aVF        | Increased | Echo (moderately reduced EF), c-MRI | Not done | Complete resolution                        |
| Asaduzzaman M, et al <b>[79]</b> | 15 | Female | Pfizer-BioNTec | Second                 | 1  | Myocarditis     | Fever, convulsions               | Qtc prolongation                                 | Increased | Echo (EF 46%)                       | Not done | Complete resolution                        |
| Durukan I, et al <b>[80]</b>     | 24 | Male   | Pfizer-BioNTec | Second                 | 14 | Myocarditis     | Bilateral lower extremities pain | ST-segment depression in leads I, II, and aVL    | Increased | Echo (EF 46%)                       | Not done | Complete resolution                        |
| Wu CT, et al <b>[81]</b>         | 44 | Female | Astrazeneca    | First                  | 2  | Perimyocarditis | Chest pain, dyspnoea             | ST-segment depression in leads V1-V2             | Increased | Echo (EF 35%), c-MRI                | Not done | Complete resolution                        |

|                                    |    |        |                |        |          |             |                                   |                                                                      |           |                                     |          |                                                   |
|------------------------------------|----|--------|----------------|--------|----------|-------------|-----------------------------------|----------------------------------------------------------------------|-----------|-------------------------------------|----------|---------------------------------------------------|
| Iwamuro A, et al <b>[82]</b>       | 17 | Male   | Moderna        | Second | Same day | Myocarditis | Arthralgia, fever                 | Diffuse ST segment elevation                                         | Increased | Echo (normal EF), c-MRI             | Not done | Complete resolution                               |
| Yamamoto S et al <b>[83]</b>       | 13 | Male   | Pfizer-BioNTec | Second | 3        | Myocarditis | Chest pain, fever                 | ST-segment elevation in the II, III, aVf, and V4–6 leads             | Increased | Echo (normal EF), c-MRI             | Not done | Complete resolution                               |
| Olmos CV et al <b>[84]</b>         | 49 | Female | Pfizer-BioNTec | Second | 6        | Myocarditis | Chest discomfort, dyspnoea        | Diffuse ST segment elevation and incomplete left bundle branch block | Increased | Echo (normal EF), c-MRI             | Yes      | AKI, pneumonia, transfer to rehabilitation centre |
| Olagunjus A et al <b>[85]</b>      | 19 | Male   | Moderna        | First  | 2        | Myocarditis | Chest pain                        | Diffuse ST segment elevation                                         | Increased | Echo (EF 49%)                       | Not done | Complete resolution                               |
| Dlewati M et al <b>[86]</b>        | 48 | Male   | Moderna        | Second | 3        | Myocarditis | Fever, fatigue, chills            | Normal ECG                                                           | Increased | Echo (EF 40%)                       | Not done | Complete resolution                               |
| Mengesha B et al <b>[87]</b>       | 43 | Female | Pfizer-BioNTec | Third  | 2        | Myocarditis | Palpitations, shortness of breath | Ventricular tachycardia                                              | Increased | Echo (EF 40–45%), c-MRI             | Yes      | Defibrillator insertion                           |
| Chellapandian SB et al <b>[88]</b> | 22 | Male   | Moderna        | Second | 2        | Myocarditis | Chest pain                        | Normal ECG                                                           | Increased | c-MRI                               | Not done | Complete resolution                               |
| Bollano E et al <b>[89]</b>        | 20 | Male   | Moderna        | Second | 7        | Myocarditis | Chest pain, fever                 | Normal ECG                                                           | Increased | Echo (normal EF), c-MRI             | Yes      | Chest pain                                        |
| Hassanzadeh S et al <b>[90]</b>    | 32 | Female | Astrazeneca    | First  | 3        | Myocarditis | Palpitations, dyspnoea            | Normal ECG                                                           | Normal    | Echo (normal EF)                    | Not done | Discharged on therapy                             |
| Ceylan ME et al <b>[91]</b>        | 57 | Female | Pfizer-BioNTec | Second | 2        | Myocarditis | Vertigo, drop attack              | Not reported                                                         | Normal    | Echo (normal EF)                    | Not done | Complete resolution                               |
| Terán Brage E, et al <b>[92]</b>   | 62 | Female | Moderna        | Third  | 1        | Myocarditis | Fever, hypotension                | Sinus tachycardia                                                    | Increased | Echo (severely depressed EF), c-MRI | Not done | Discharged on therapy                             |

|                          |    |        |                                         |        |    |             |                                        |                                                           |           |                                 |          |                       |
|--------------------------|----|--------|-----------------------------------------|--------|----|-------------|----------------------------------------|-----------------------------------------------------------|-----------|---------------------------------|----------|-----------------------|
| Mohammed LM et al [93]   | 19 | Male   | mRNA vaccine (no further specification) | First  | 14 | Myocarditis | Chest pain                             | Moderate ST depression in V1-V2                           | Increased | Echo (normal EF), CT            | Not done | Discharged on therapy |
| Kojima N, et al [94]     | 17 | Male   | Pfizer-BioNTec                          | Second | 2  | Myocarditis | Chest pain, fever, diarrhoea           | ST elevation in V2-V5 leads                               | Increased | Echo (EF 55%), c-MRI            | Yes      | Complete resolution   |
| Korosoglou G, et al [95] | 21 | Male   | Pfizer-BioNTec                          | Second | 2  | Myocarditis | Chest pain, fatigue, myalgia, headache | ST elevation in V2-V5 leads                               | Normal    | Echo (EF 45%), c-MRI            | Not done | Complete resolution   |
| Mancini N, et al [96]    | 31 | Male   | Pfizer-BioNTec                          | Second | 4  | Myocarditis | Chest pain                             | ST elevation in V1-V3 leads                               | Increased | c-MRI                           | Not done | Complete resolution   |
| Kang DH, et al [97]      | 48 | Female | Pfizer-BioNTec                          | Second | 4  | Myocarditis | Palpitations                           | ST elevation in V2-V5 leads                               | Increased | Echo (EF 15%), c-MRI            | Not done | Heart transplantation |
| Kawakami T, et al [98]   | 45 | Female | Moderna                                 | Second | 14 | Myocarditis | Chest pain                             | Inverted T waves in inferior leads                        | Increased | Echo (mildly reduced EF), c-MRI | Not done | Complete resolution   |
| Lee CH et al [99]        | 22 | Male   | Moderna                                 | Second | 5  | Myocarditis | Chest pain                             | ST-segment depression and T-wave inversion in leads V1-V4 | Increased | Echo (normal EF), c-MRI         | Not done | Complete resolution   |
| Kazama S, et al [100]    | 48 | Female | Moderna                                 | Second | 7  | Myocarditis | Malaise, dyspnoea                      | ST elevation in V1-V5 leads                               | Increased | Echo (EF 11%), c-MRI            | Yes      | Complete resolution   |
| Al-Rasbi S, et al [101]  | 37 | Male   | Pfizer-BioNTec                          | First  | 12 | Myocarditis | Back pain, left arm pain               | Normal morphology                                         | Increased | Echo (EF 45-50%), c-MRI         | Not done | Discharged on therapy |
| Sano M, et al [102]      | 20 | Male   | Moderna                                 | Second | 2  | Myocarditis | Chest pain, fever                      | Diffuse ST segment elevation                              | Increased | Echo (EF 45-42%), c-MRI         | Yes      | Complete resolution   |

|                                    |    |        |                                                 |        |          |                  |                              |                                                                                           |           |                                 |          |                         |
|------------------------------------|----|--------|-------------------------------------------------|--------|----------|------------------|------------------------------|-------------------------------------------------------------------------------------------|-----------|---------------------------------|----------|-------------------------|
| Kyaw H, et al <b>[103]</b>         | 24 | Male   | Pfizer-BioNTec                                  | Second | 6 hour   | Myocarditis      | Chest pain                   | Normal morphology                                                                         | Increased | Echo (EF 55%), c-MRI            | Not done | Complete resolution     |
| Oka A, et al <b>[104]</b>          | 50 | Male   | Pfizer-BioNTec                                  | Second | 10       | Myocarditis      | Chest pain, syncope          | ST elevation in V1-V4 leads with complete right bundle branch block                       | Increased | Echo (EF 35%), c-MRI            | Yes      | Complete resolution     |
| Uesako H, et al <b>[105]</b>       | 26 | Male   | Pfizer-BioNTec                                  | First  | 5        | Peri-myocarditis | Fatigue, headache, syncope   | Ventricular fibrillation                                                                  | Increased | Echo (mildly reduced EF), c-MRI | Yes      | Defibrillator insertion |
| Fosch X, et al <b>[106]</b>        | 24 | Male   | Pfizer-BioNTec                                  | Third  | 1        | Myocarditis      | Chest pain                   | diffuse concave ST segment elevation and a PR segment elevation in lead aVR               | Increased | Echo (EF 56%), c-MRI            | Not done | Discharged on therapy   |
| Naghashzadeh F, et al <b>[107]</b> | 29 | Male   | rAd26 and rAd5 vector-based vaccine (Sputnik V) | Second | 2        | Myocarditis      | Chest pain                   | ST segment elevation in leads V3-V4                                                       | Increased | Echo (EF 30-35%), c-MRI         | Yes      | Complete resolution     |
| Agdamag ACC, et al <b>[108]</b>    | 80 | Female | Pfizer-BioNTec                                  | First  | 7        | Myocarditis      | Emesis, abdominal discomfort | Non-specific ST-segment and T-wave abnormalities and low voltage QRS complexes throughout | Increased | Echo (normal EF), c-MRI         | Yes      | Complete resolution     |
| Wong J, et al <b>[109]</b>         | 20 | Male   | Pfizer-BioNTec                                  | Second | 12 hours | Myocarditis      | Chest pain, headache         | Diffuse ST segment elevation                                                              | Increased | Echo (normal EF), c-MRI         | Not done | Discharged on therapy   |

|                                  |    |              |                                          |              |    |                 |                         |                                                                                                       |             |                               |          |                                             |
|----------------------------------|----|--------------|------------------------------------------|--------------|----|-----------------|-------------------------|-------------------------------------------------------------------------------------------------------|-------------|-------------------------------|----------|---------------------------------------------|
| Ohnishi M, et al <b>[110]</b>    | 26 | Male         | Pfizer-BioNTec                           | Second       | 4  | Myocarditis     | Chest pain              | ST segment elevation in I, II, aVL, aVF, V4-V6, and small Q wave in II, III, aVF                      | Increased   | Echo (EF 53%), c-MRI          | Not done | Post vaccination syndrome                   |
| Aikawa T, et al <b>[111]</b>     | 20 | Male         | Moderna                                  | Second       | 2  | Myocarditis     | Chest pain              | ST segment elevation in leads I, aVL, and V2-V6                                                       | Increased   | Echo (EF not reported), c-MRI | Yes      | Complete resolution                         |
| Chachar TS, et al <b>[112]</b>   | 24 | Male         | Pfizer-BioNTec                           | First        | 5  | Myocarditis     | Chest pain              | Subtle ST elevation in the precordial leads                                                           | Increased   | Echo (EF 55%), c-MRI          | Not done | Discharged on therapy                       |
| Wu B, et al <b>[113]</b>         | 40 | Male         | Pfizer-BioNTec                           | First        | 3  | Myocarditis     | Chest pain, dyspnoea    | Diffuse ST elevation across all leads, except lead III and aVR and V1 where there were ST depressions | Increased   | Echo (EF 47%), c-MRI          | Yes      | Occasional pleuritic, left-sided discomfort |
| Mimouni H, et al <b>[114]</b>    | 14 | Not reported | m-RNA vaccine (no further specification) | Not reported | 10 | Myocarditis     | Extreme asthenia, fever | Sinus tachycardia                                                                                     | Increased   | Echo (EF 25%), c-MRI          | Not done | Discharged on therapy                       |
| Ameratunga R, et al <b>[115]</b> | 57 | Female       | Pfizer-BioNTec                           | First        | 1  | Myocarditis     | Fatigue, lethargy       | Not done                                                                                              | Not checked | Not done                      | Yes      | Death                                       |
| Umei TC, et al <b>[116]</b>      | 20 | Male         | Moderna                                  | Second       | 2  | Myopericarditis | Chest pain, fever       | Diffuse ST elevation                                                                                  | Increased   | Echo (EF 55%), c-MRI          | Not done | Complete resolution                         |



|                                  |    |        |                |              |   |                 |                                 |                                                                                                                                                 |           |                               |          |                                   |
|----------------------------------|----|--------|----------------|--------------|---|-----------------|---------------------------------|-------------------------------------------------------------------------------------------------------------------------------------------------|-----------|-------------------------------|----------|-----------------------------------|
| Nagasaka T, et al <b>[117]</b>   | 23 | Male   | Pfizer-BioNTec | Second       | 3 | Myocarditis     | Chest pain, fever               | Subtle ST elevation                                                                                                                             | Increased | Echo (EF not reported), c-MRI | Yes      | Complete resolution               |
| Tinoco M, et al <b>[118]</b>     | 39 | Male   | Pfizer-BioNTec | Second       | 3 | Perimyocarditis | Chest pain, fever               | ST segment elevation with depressed PR segment in leads V3 to V6, DI, DII, aVL, and ST segment depression with PR segment elevation in lead aVR | Increased | Echo (EF 48%), c-MRI          | Not done | Discharged on therapy             |
| Maeda M, et al <b>[119]</b>      | 29 | Male   | Moderna        | First        | 4 | Myocarditis     | Chest pain                      | ST-T changes in D3, V1, aVL                                                                                                                     | Increased | c-MRI                         | Not done | Not reported                      |
| Kadwalwala M, et al <b>[120]</b> | 38 | Female | Moderna        | First        | 8 | Myopericarditis | Chest pain, shortness of breath | Right bundle branch block                                                                                                                       | Increased | Echo (EF 30-10%), c-MRI       | Yes      | Discharged on therapy. Reduced EF |
| Miqdad MA, et al <b>[121]</b>    | 18 | Male   | Pfizer-BioNTec | Second       | 4 | Myocarditis     | Chest pain                      | ST segment elevation in leads I, II along with V2-V6                                                                                            | Increased | Echo (EF 63%), c-MRI          | Not done | Complete resolution               |
| Lim Y, et al <b>[122]</b>        | 38 | Female | Pfizer-BioNTec | Not reported | 8 | Myocarditis     | Chest pain                      | Diffuse ST segment elevation                                                                                                                    | Increased | Echo (EF 10%), c-MRI          | Yes      | Complete resolution               |
| Azir M, et al <b>[123]</b>       | 17 | Male   | Pfizer-BioNTec | Second       | 3 | Myocarditis     | Chest pain, dyspnoea            | Lateral ST elevation                                                                                                                            | Increased | Echo (EF 55%), c-MRI          | Not done | Complete resolution               |
| Kaneta K, et al <b>[124]</b>     | 25 | Male   | Moderna        | Second       | 3 | Myocarditis     | Chest pain, fever               | ST elevation in inferior and lateral leads                                                                                                      | Increased | Echo (EF not reported), c-MRI | Not done | Complete resolution               |

|                                 |    |      |                               |        |               |                 |                   |                                                                  |            |                         |                   |                                 |
|---------------------------------|----|------|-------------------------------|--------|---------------|-----------------|-------------------|------------------------------------------------------------------|------------|-------------------------|-------------------|---------------------------------|
| Schmitt P, et al <b>[125]</b>   | 19 | Male | Pfizer-BioNTec                | Second | 3             | Myocarditis     | Chest pain        | Diffuse ST segment elevation and PR depression in inferior leads | Increased  | Echo (EF 72%), c-MRI    | Not done          | Complete resolution             |
| Habedank D, et al <b>[126]</b>  | 60 | Male | Moderna                       | Second | 3             | Myocarditis     | Syncope           | Normal morphology                                                | Increased  | Echo (normal EF), c-MRI | Not done          | Complete resolution             |
| Facetti S, et al <b>[127]</b>   | 20 | Male | Pfizer-BioNTec                | Second | 2             | Myopericarditis | Chest pain        | ST segment elevation in inferior leads and V2-V4                 | Increased  | Echo (normal EF), c-MRI | Not done          | Complete resolution             |
| Riedel PG, et al <b>[128]</b>   | 47 | Male | Inactivated vaccine (Sinovac) | Second | Not specified | Myocarditis     | Chest pain        | Left ventricular overload                                        | Increased  | Echo (EF 15%), c-MRI    | Not done          | Persisting fatigue and dyspnoea |
| Choi S, et al <b>[129]</b>      | 22 | Male | Pfizer-BioNTec                | First  | 5             | Myocarditis     | Syncope           | Ventricular fibrillation                                         | Not tested | Not done                | Done with autopsy | Death                           |
| Gautam N, et al <b>[130]</b>    | 66 | Male | Pfizer-BioNTec                | Second | 90            | Myocarditis     | Chest pain        | ST elevation in anterior leads                                   | Increased  | c-MRI                   | Not done          | Complete resolution             |
| Kim D, et al <b>[131]</b>       | 29 | Male | Pfizer-BioNTec                | Second | 1             | Myopericarditis | Chest pain        | Normal morphology                                                | Increased  | Echo (EF 62%), c-MRI    | Not done          | Complete resolution             |
| Sakaguchi S, et al <b>[132]</b> | 49 | Male | Pfizer-BioNTec                | Second | 11            | Myocarditis     | Fever, cough      | Low voltage in the limb leads and poor R waves in V1-2           | Increased  | Echo (EF 33%), c-MRI    | Yes               | Complete resolution             |
| Nguyen TD, et al <b>[133]</b>   | 20 | Male | Moderna                       | First  | 12 hours      | Myocarditis     | Chest pain, fever | Pre-excitation features                                          | Increased  | c-MRI                   | Yes               | Complete resolution             |
| Taylor PD, et al <b>[134]</b>   | 44 | Male | Moderna                       | Second | 4             | Myocarditis     | Chest pain        | ST-segment elevation in the lateral limb and                     | Increased  | Echo (EF 40%), c-MRI    | Not done          | Complete resolution             |

|                                   |    |        |                |        |   |                 |                                          |                                                                                                                                |           |                         |          |                          |
|-----------------------------------|----|--------|----------------|--------|---|-----------------|------------------------------------------|--------------------------------------------------------------------------------------------------------------------------------|-----------|-------------------------|----------|--------------------------|
|                                   |    |        |                |        |   |                 |                                          | precordial leads                                                                                                               |           |                         |          |                          |
| Ehrlic P, et al <b>[125]</b>      | 40 | Male   | Pfizer-BioNTec | First  | 6 | Myocarditis     | Chest pain, fever, shortness of breath   | Normal morphology                                                                                                              | Increased | Echo (EF 45%)           | Yes      | Complete resolution      |
| Sulemankhil I, et al <b>[135]</b> | 33 | Male   | Janssen        | First  | 2 | Myocarditis     | Chest pain                               | Normal morphology                                                                                                              | Increased | Echo (normal EF), c-MRI | Not done | Discharged on therapy    |
| Kim IC, et al <b>[136]</b>        | 24 | Male   | Pfizer-BioNTec | Second | 1 | Myocarditis     | Chest pain                               | Diffuse ST elevation in lead II, and V2-V5                                                                                     | Increased | Echo (normal EF), c-MRI | Not done | Complete resolution      |
| Patrignani A, et al <b>[137]</b>  | 56 | Male   | Pfizer-BioNTec | First  | 4 | Myocarditis     | Epigastric pain                          | Normal morphology                                                                                                              | Increased | Echo (normal EF), c-MRI | Not done | Complete resolution      |
| Hasnie AA, et al <b>[138]</b>     | 22 | Male   | Moderna        | First  | 3 | Perimyocarditis | Chest pain                               | Diffuse ST segment elevation                                                                                                   | Increased | Echo EF (50-55%), c-MRI | Not done | Discharged on therapy    |
| Isaak A, et al <b>[139]</b>       | 15 | Male   | Pfizer-BioNTec | Second | 1 | Myocarditis     | Fever, myalgia, intermittent tachycardia | ST-segment elevation in the left precordial leads                                                                              | Increased | Echo (normal EF), c-MRI | Not done | Discharged (on therapy?) |
| Williams CB, et al <b>[140]</b>   | 34 | Male   | Moderna        | Second | 3 | Perimyocarditis | Chest pain, fever, myalgia               | Lateral PR-segment depression and ST-segment elevation mirrored in the aVR with PR-segment elevation and ST-segment depression | Increased | Echo (EF 43%), c-MRI    | Not done | Discharged on therapy    |
| Nassar M, et al <b>[141]</b>      | 70 | Female | Janssen        | First  | 2 | Myocarditis     | Dyspnoea                                 | T wave inversions in leads V4-V6 without                                                                                       | Normal    | Echo (EF 10%)           | Not done | Death                    |

|                                       |    |      |                |        |         |                 |                      |                                        |           |                         |          |                               |
|---------------------------------------|----|------|----------------|--------|---------|-----------------|----------------------|----------------------------------------|-----------|-------------------------|----------|-------------------------------|
|                                       |    |      |                |        |         |                 |                      | any ST-segment change                  |           |                         |          |                               |
| Cereda A, et al <b>[142]</b>          | 21 | Male | Pfizer-BioNTec | Second | 2       | Myocarditis     | Chest pain, fever    | Diffuse ST segment elevation           | Increased | Echo (normal EF), c-MRI | Not done | Complete resolution           |
| Watkins K, et al <b>[143]</b>         | 20 | Male | Pfizer-BioNTec | Second | 2       | Myocarditis     | Chest pain           | Diffuse ST segment elevation           | Increased | Echo (c-MRI 59%), c-MRI | Not done | Discharged on therapy         |
| Deb A, et al <b>[144]</b>             | 67 | Male | Moderna        | Second | 6 hours | Myocarditis     | Dyspnoea, fever      | Non specific ST/T wave changes         | Increased | Echo (EF 50-54%)        | Not done | Complete resolution           |
| Habib MB, et al <b>[145]</b>          | 37 | Male | Pfizer-BioNTec | Second | 3       | Myocarditis     | Chest pain           | ST segment elevation in anterior leads | Increased | Echo (EF 57%), c-MRI    | Not done | Complete resolution           |
| Minocha PK, et al <b>[146]</b>        | 17 | Male | Pfizer-BioNTec | Second | 1       | Myocarditis     | Body aches, fever    | Diffuse ST segment elevation           | Increased | Echo (EF 53%)           | Not done | Complete resolution           |
| Muthukumar A, et al <b>[147]</b>      | 52 | Male | Moderna        | Second | 3       | Myocarditis     | Chest pain, headache | Incomplete right bundle branch block   | Increased | Echo (normal EF), c-MRI | Not done | Discharged on therapy         |
| McLean K, et al <b>[148]</b>          | 16 | Male | Pfizer-BioNTec | Second |         | Myopericarditis | Chest pain           | ST elevation in V2-V6 and I and aVL    | Increased | Echo (normal EF), c-MRI | Not done | Discharged on medical therapy |
| D'Angelo T, et al <b>[23]</b>         | 30 | Male | Pfizer-BioNTec | Second | 3       | Myocarditis     | Chest pain, dyspnoea | Subtle ST segment elevation in V2-V4   | Increased | Echo (normal EF), c-MRI | Not done | Complete resolution           |
| Albert E, et al <b>[149]</b>          | 24 | Male | Moderna        | Second | 4       | Myocarditis     | Chest pain           | Normal morphology                      | Increased | Echo (EF 65%), c-MRI    | Not done | Discharged on therapy         |
| Bautista García J, et al <b>[150]</b> | 39 | Male | Pfizer-BioNTec | Second | 6 hours | Myocarditis     | Chest pain, fever    | Diffuse ST segment elevation           | Increased | c-MRI                   | Not done | Complete resolution           |

## References

43. Walters, C.G.; Jaiswal, D.D.; Hu, T.X.; Kim, S.S. Myopericarditis in a Young Adult Secondary to COVID-19 Vaccination. *Methodist DeBakey Cardiovasc. J.* 2021, 17, 13–17.
44. Fritz, R.O.; Betageri, O.; Chakraborty, T.; Kim, J.; Al-Ani, M.; Omar, A. Severe myopericarditis following the third dose of an mRNA COVID-19 vaccine: Utility of a multimodal treatment approach. *BMJ Case Rep.* 2022, 15, e249533.
45. Elhouderi, E.; Elsalwaly, E.; Kabbani, M. Myopericarditis after mRNA COVID-19 Vaccine in a Patient with Recent History of COVID-19. *Cureus* 2022, 14, e25264.
46. Javed, A.; Medina, Y.; Tian, J.; Alvi, M.J.; Sahra, S.; Rojas-Martel, G. An Unusual Case of Hemorrhagic Pleuropericarditis after COVID-19 Vaccination. *Cureus* 2022, 14, e24828.
47. Patel, K.; Dalal, S.; Tran, D.; Patel, A.; McMackin, C. COVID-19 mRNA Vaccine Induced Pericarditis with Large Pericardial Effusion Followed by New-Onset Arrhythmia. *Cureus* 2022, 14, e24699.
48. Generette, G.S.; Troyer, J.; Hemenway, A.; Al Zoubi, M. Myopericarditis with hemorrhagic pericardial effusion following BNT162b2 mRNA COVID-19 vaccine. *IDCases* 2022, 28, e01511.
49. Mizoguchi, T.; Yokoi, M.; Shintani, Y.; Yamamoto, J.; Mori, K.; Fujita, H.; Ito, T.; Sugiura, T.; Seo, Y. A case of an elderly female who developed subacute pleuropericarditis following BNT162b2 mRNA COVID-19 vaccination. *J. Cardiol. Cases* 2022, 26, 225–228. <https://doi.org/10.1016/j.jccase.2022.04.020>.
50. Morton, Z.; Green, D.; Grisham, M. A case of myopericarditis following administration of the Pfizer COVID-19 vaccine. *Arch. Clin. Cases* 2022, 9, 1–5.
51. Park, S.; You, J. A Case of Myocarditis Presenting with a Hyperechoic Nodule after the First Dose of COVID-19 mRNA Vaccine. *J. Korean Med. Sci.* 2022, 37, e131.
52. Perna, F.; Verecchia, E.; Pinnacchio, G.; Gerardino, L.; Brucato, A.; Manna, R. Rapid resolution of severe pericardial effusion using anakinra in a patient with COVID-19 vaccine-related acute pericarditis relapse: A case report. *Eur. Heart J. Case Rep.* 2022, 6, yta123.
53. Sharbatdaran, A.; Chahal, Y.; Molaei, M.; Bhavsar, D. A rare case of COVID-19 vaccine-induced myopericarditis in a young adult. *Radiol. Case Rep.* 2022, 17, 1916–1920.
54. Misumi, I.; Ogata, A.; Fukuda, K.; Sato, K.; Nagano, M.; Usuku, H.; Tsujita, K. Constrictive pericarditis following mRNA COVID-19 vaccination in a patient with systemic sclerosis. *J. Cardiol. Cases* 2022, 26, 97–100.
55. Kim, S.H.; Lee, S.Y.; Kim, G.Y.; Oh, J.S.; Kim, J.; Chun, K.J.; Ju, M.H.; Lee, C.H.; Song, Y.J.; Na, J.Y. A Case of Heart Trans-plantation for Fulminant Myocarditis after ChAdOx1 nCoV-19 Vaccination. *J. Korean Med. Sci.* 2022, 37, e104.
56. Gill, J.; Mallari, A.J.P.; Zahra, F. Transient Myopericarditis Following Vaccination for COVID-19. *J. Med. Cases* 2022, 13, 80–84.
57. Fadiah, K.; Abolbashari, M.; Ojha, C.; Alkhateeb, H. Acute Myopericarditis after First Dose of mRNA-1273 SARS-CoV-2 Vaccine in a Young Adult. *Cureus* 2022, 14, e22111.
58. Singh, A.; Nguyen, L.; Everest, S.; Afzal, S.; Shim, A. Acute Pericarditis Post mRNA-1273 COVID Vaccine Booster. *Cureus* 2022, 14, e22148.
59. Viani, G.M.; Pedrotti, P.; Seregni, R.; Antonio, B. Effusive-constrictive pericarditis after the second dose of BNT162b2 vaccine (Comirnaty): A case report. *Eur. Heart J. Case Rep.* 2022, 6, yta012.
60. Zaki, H.A.; Zahran, A.; Abdelrahman, M.; Elnabawy, W.A.; Kaber, Y. A Case of Acute Viral Pericarditis Complicated with Pericardial Effusion Induced by Third Dose of COVID Vaccination. *Cureus* 2022, 14, e21207.
61. Plüß, M.; Mese, K.; Kowallick, J.T.; Schuster, A.; Tampe, D.; Tampe, B. Case Report: Cytomegalovirus Reactivation and Peri-carditis Following ChAdOx1 nCoV-19 Vaccination Against SARS-CoV-2. *Front. Immunol.* 2022, 12, 784145.
62. Nakanishi, Y.; Honda, S.; Yamano, M.; Kawasaki, T.; Yoshioka, K. Constrictive pericarditis after SARS-CoV-2 vaccination: A case report. *Int. J. Infect. Dis.* 2022, 116, 238–240.
63. Hryniewicki, A.T.; Tolia, V.M.; Nene, R.V. Cardiac Tamponade after COVID-19 Vaccination. *J. Emerg. Med.* 2022, 62, 250–253.
64. Badshah, M.; Shriver, J.; Rynders, B.; Sjøvold, A.; Shaikat, M.H.S.; Rajpurohit, N. MODERNA mRNA-1273 vaccine-associated myopericarditis in a patient with a subclinical autoimmune predisposition. *J. Cardiol. Cases* 2021, 24, 227–229.
65. Ashaari, S.; Sohaib, H.A.; Bolger, K. A case report: Symptomatic pericarditis post-COVID-19 vaccination. *Eur. Heart J. Case Rep.* 2021, 5, ytab375.
66. Khogali, F.; Abdelrahman, R. Unusual Presentation of Acute Perimyocarditis Following SARS-CoV-2 mRNA-1237 Moderna Vaccination. *Cureus* 2021, 13, e16590.
67. Horiuchi, K.; Kosugi, S.; Abe, H.; Ueda, Y. Fulminant myocarditis after the first dose of mRNA-1273 vaccination in a patient with previous COVID-19: A case report. *Eur. Heart J. Case Rep.* 2022, 6, yta290.
68. Hoshino, N.; Yanase, M.; Ichiyasu, T.; Kuwahara, K.; Kawai, H.; Muramatsu, T.; Ishii, H.; Tsukamoto, T.; Morimoto, S.I.; Izawa, H. An autopsy case report of fulminant myocarditis: Following mRNA COVID-19 vaccination. *J. Cardiol. Cases* 2022, Epub ahead of print. <https://doi.org/10.1016/j.jccase.2022.06.006>.
69. Anthony, J.A.; Echeverry, T.; Fishberg, R.D. The Rise of mRNA COVID-19 Vaccine-Associated Myocarditis and Its Implications on the Future Use of This New Vaccine Platform. *Cureus* 2022, 14, e25631.

70. Hirsch, V.G.; Schallhorn, S.; Zwadlo, C.; Diekmann, J.; Länger, F.; Jonigk, D.D.; Kempf, T.; Schultheiss, H.P.; Bauersachs, J. Giant cell myocarditis after first dose of BNT162b2—A case report. *Eur. J. Heart Fail.* 2022, 24, 1319–1322.
71. Etuk, A.S.; Jackson, I.N.; Panayiotou, H. A Rare Case of Myocarditis after the First Dose of Moderna Vaccine in a Patient with Two Previous COVID-19 Infections. *Cureus* 2022, 14, e24802.
72. Alizadeh, L.S.; Koch, V.; Yel, I.; Grünewald, L.D.; Mathies, D.; Martin, S.; Vogl, T.J.; Rauschnig, D.; Booz, C. A case of myo-carditis after COVID-19 vaccination: Incidental or consequential? *Heliyon* 2022, 8, e09537.
73. Khan, M.Z.; Janus, S.; Franklin, S.; Figueredo, V.; Baqi, A.; Alvarez, R. COVID-19 Vaccination-Induced Cardiomyopathy Re-quiring Permanent Left Ventricular Assist Device. *Cureus* 2022, 14, e24477.
74. Kawano, H.; Motokawa, T.; Kurohama, H.; Okano, S.; Akashi, R.; Yonekura, T.; Ikeda, S.; Izumikawa, K.; Maemura, K. Ful-minant Myocarditis 24 Days after Coronavirus Disease Messenger Ribonucleic Acid Vaccination. *Intern. Med.* 2022, 61, 2319–2325.
75. Bae, D.H.; Kim, M.; Lee, D.I.; Lee, J.H.; Kim, S.; Lee, S.Y.; Bae, J.W.; Hwang, K.K.; Kim, D.W.; Cho, M.C. Simultaneous Occurrence of Immune-Mediated Thrombocytopenia and Myocarditis after mRNA-1273 COVID-19 Vaccination: A Case Report. *J. Korean Med. Sci.* 2022, 37, e169.
76. Kimura, M.; Hashimoto, T.; Noda, E.; Ishikawa, Y.; Ishikita, A.; Fujino, T.; Matsushima, S.; Ide, T.; Kinugawa, S.; Nagaoka, K.; et al. Fulminant necrotizing eosinophilic myocarditis after COVID-19 vaccination survived with mechanical circulatory support. *ESC Heart Fail.* 2022, 9, 2732–2737.
77. Marsukjai, A.; Theerasuwipakorn, N.; Tumkosit, M.; Chattranukulchai, P.; Srichomkwun, P.; Prechawat, S. Concomitant myocarditis and painless thyroiditis after AstraZeneca coronavirus disease 2019 vaccination: A case report. *J. Med. Case Rep.* 2022, 16, 212.
78. Ansari, U.; Britsch, S.; Rogowski, S.; Duerschmied, D.; Papavassiliu, T. Case Report: Transient Increase of CMR T1 Mapping Indices in a Patient with COVID-19 mRNA Vaccine Induced Acute Myocarditis. *Front. Cardiovasc. Med.* 2022, 9, 880717.
79. Asaduzzaman, M.; Purkayastha, B.; Alam, M.M.J.; Chakraborty, S.R.; Roy, S.; Ahmed, N. COVID-19 mRNA vaccine-associated encephalopathy, myocarditis, and thrombocytopenia with excellent response to methylprednisolone: A case report. *J. Neu-roimmunol.* 2022, 368, 577883.
80. Durucan, I.; Guner, S.; Kilickiran Avci, B.; Unverengil, G.; Melikoglu, M.; Ugurlu, S. Post Covid-19 Vaccination Inflammatory Syndrome: A Case Report. *Mod. Rheumatol. Case Rep.* 2022, 378–406. <https://doi.org/10.1093/mrcr/rxac041>.
81. Wu, C.T.; Chin, S.C.; Chu, P.H. Acute Fulminant Myocarditis after ChAdOx1 nCoV-19 Vaccine: A Case Report and Literature Review. *Front. Cardiovasc. Med.* 2022, 9, 856991.
82. Iwamuro, A.; Sasa, T.; Kawai, T.; Taguchi, M.; Izuhara, M.; Uegaito, T.; Shioji, K. A 17-year-old male with acute myocarditis following mRNA-1273 vaccination in Japan. *J. Cardiol. Cases* 2022, 26, 108–110.
83. Yamamoto, S.; Arita, Y.; Ogasawara, N. Myocarditis Following the Second Dose of COVID-19 Vaccination in a Japanese Ad-olescent. *Cureus* 2022, 14, e23474.
84. Olmos, C.V.; Trahan, S.; Rochon, A.; Ducharme, A. Severe myocarditis after SARS-CoV-2 vaccination in a 49-year-old woman. *CMAJ* 2022, 194, E581–E584.
85. Olagunju, A.; Moradi, A.; Johnson, B.; Lebaron, Z.; Johnson, R.; Mehdizadeh, A. Acute Myocarditis Following Vaccination with the First Dose of the mRNA-1273 Vaccine. *J. Investig. Med. High Impact Case Rep.* 2022, 10, 23247096221092291.
86. Dlewati, M.; Park, K.; Rawat, S.; Conte, J.; Bhadha, K. COVID-19 mRNA Vaccine-Associated Myocarditis Presenting as STEMI in a 48-Year-Old Male. *Case Rep. Cardiol.* 2022, 2022, 2284530.
87. Mengesha, B.; Asenov, A.G.; Hirsh-Racah, B.; Amir, O.; Pappo, O.; Asleh, R. Severe Acute Myocarditis after the Third (Booster) Dose of mRNA COVID-19 Vaccination. *Vaccines* 2022, 10, 575.
88. Chellapandian, S.B.; Turkmen, S.; Salim, I.; Chinnakaruppan, S.; Mohammad, J. Myocarditis following COVID-19 mRNA (mRNA-1273) vaccination. *Clin. Case Rep.* 2022, 10, e05741.
89. Bollano, E.; Bergh, N.; Dudás, A.; Bobbio, E.; Polte, C.L. Somatostatin receptor positron emission tomography/computed tomography in myocarditis following mRNA COVID-19 vaccination. *Eur. Heart J. Case Rep.* 2022, 6, yta117.
90. Hassanzadeh, S.; Sadeghi, S.; Mirdamadi, A.; Nematollahi, A. Myocarditis following AstraZeneca (an adenovirus vector vaccine) COVID-19 vaccination: A case report. *Clin. Case Rep.* 2022, 10, e05744.
91. Ceylan, M.E.; Önen Ünsalver, B.; Dönmez, A.; Kaya Yertutanol, F.D.; Evrensel, A.; Ceylan, H.Z. A case of myocarditis and isolated hyponatremia after Biontech-Pfizer vaccine for Covid-19. *Vaccine* 2022, 40, 2897–2898.
92. Terán Brage, E.; Roldán Ruíz, J.; González Martín, J.; Oviedo Rodríguez, J.D.; Vidal Tocino, R.; Rodríguez Diego, S.; Sánchez Hernández, P.L.; Bellido Hernández, L.; Fonseca Sánchez, E. Fulminant myocarditis in a patient with a lung adenocarcinoma after the third dose of modern COVID-19 vaccine. A case report and literature review. *Curr. Probl. Cancer Case Rep.* 2022, 6, 100153.
93. Mohammed, L.M.; Dhillon, V.; Bong, J.P.; Patri, J. Myocarditis Secondary to COVID-19 mRNA Vaccine: A Case Report. *Cureus* 2022, 14, e22345.

94. Kojima, N.; Tada, H.; Okada, H.; Yoshida, S.; Sakata, K.; Usui, S.; Ikeda, H.; Okajima, M.; Kawashiri, M.A.; Takamura, M. Case Report: Myocarditis Associated with COVID-19 mRNA Vaccination Following Myocarditis Associated with Campylobacter Jejuni. *Front. Cardiovasc. Med.* 2022, 9, 837759.
95. Korosoglou, G.; Nunninger, P.; Giusca, S. Case Report: Disappearance of Late Gadolinium Enhancement and Full Functional Recovery in a Young Patient with SARS-CoV-2 Vaccine-Related Myocarditis. *Front. Cardiovasc. Med.* 2022, 9, 852931.
96. Mancini, N.; Cortigiani, L.; Aquaro, G.; Bovenzi, F.M. Raro caso di miocardite ed embolia polmonare dopo vaccino a mRNA BNT162b2 [A rare case of myocarditis and pulmonary embolism after BNT162b2 mRNA vaccine]. *G. Ital. Cardiol.* 2022, 23, 244–246.
97. Kang, D.H.; Na, J.Y.; Yang, J.H.; Moon, S.H.; Kim, S.H.; Jung, J.J.; Cha, H.J.; Ahn, J.H.; Park, Y.W.; Cho, S.Y.; et al. Fulminant Giant Cell Myocarditis following Heterologous Vaccination of ChAdOx1 nCoV-19 and Pfizer-BioNTech COVID-19. *Medicina* 2022, 58, 449.
98. Kawakami, T.; Yahagi, K.; Sekiguchi, M.; Ishizawa, T.; Nonaka, H.; Setoguchi, N.; Watanabe, Y.; Nakase, M.; Horiuchi, Y.; Asami, M.; et al. Acute Myocarditis in a Patient Following mRNA-1273 SARS-CoV-2 Vaccination. *Intern. Med.* 2022, 61, 1371–1374.
99. Lee, C.H.; Kong, E.J. FDG PET/MRI of Acute Myocarditis after mRNA COVID-19 Vaccination. *Clin. Nucl. Med.* 2022, 47, e421–e422.
100. Kazama, S.; Okumura, T.; Kimura, Y.; Ito, R.; Araki, T.; Mizutani, T.; Oishi, H.; Kuwayama, T.; Hiraiwa, H.; Kondo, T.; et al. Biopsy-Proven Fulminant Myocarditis Requiring Mechanical Circulatory Support Following COVID-19 mRNA Vaccination. *CJC Open* 2022, 4, 501–505.
101. Al-Rasbi, S.; Al-Maqbali, J.S.; Al-Farsi, R.; Al Shukaili, M.A.; Al-Riyami, M.H.; Al Falahi, Z.; Al Farhan, H.; Al Alawi, A.M. Myocarditis, Pulmonary Hemorrhage, and Extensive Myositis with Rhabdomyolysis 12 Days after First Dose of Pfizer-BioNTech BNT162b2 mRNA COVID-19 Vaccine: A Case Report. *Am. J. Case Rep.* 2022, 23, e934399.
102. Sano, M.; Murai, R.; Kim, K.; Furukawa, Y. Cardiac magnetic resonance findings in acute myocarditis after mRNA COVID-19 vaccination. *J. Cardiol. Cases* 2022, 26, 17–20.
103. Kyaw, H.; Shajahan, S.; Gulati, A.; Synn, S.; Khurana, S.; Nazar, N.; Shrestha, S.; Kerstein, J. COVID-19 mRNA Vaccine-Associated Myocarditis. *Cureus* 2022, 14, e21009.
104. Oka, A.; Sudo, Y.; Miyoshi, T.; Ozaki, M.; Kimura, Y.; Takagi, W.; Ugawa, S.; Okada, T.; Nosaka, K.; Doi, M. Fulminant myocarditis after the second dose of COVID-19 mRNA vaccination. *Clin. Case Rep.* 2022, 10, e05378.
105. Uesako, H.; Fujikawa, H.; Hashimoto, S.; Wakabayashi, T. Prominent J Waves and Ventricular Fibrillation Caused by Myocarditis and Pericarditis after BNT162b2 mRNA COVID-19 Vaccination. *Can. J. Cardiol.* 2022, 38, 844–847.
106. Fosch, X.; Serra, J.; Torres, P.L.; Preda, L.; González, R.; Mojer, F. Miocarditis aguda tras la tercera dosis de la vacuna BNT162b2 contra la COVID-19 [Acute myocarditis after a third dose of the BNT162b2 COVID-19 vaccine]. *Rev. Esp. Cardiol.* 2022.
107. Naghashzadeh, F.; Shafaghi, S.; Dorudinia, A.; Naji, S.A.; Marjani, M.; Amin, A.; Mohamadifar, A.; Noorali, S.; Kashani, B.S. Myocarditis following rAd26 and rAd5 vector-based COVID-19 vaccine: Case report. *ESC Heart Fail.* 2022, 9, 1483–1486.
108. Agdamag, A.C.C.; Gonzalez, D.; Carlson, K.; Konety, S.; McDonald, W.C.; Martin, C.M.; Maharaj, V.; Alexy, T. Fulminant myocarditis following coronavirus disease 2019 vaccination: A case report. *Eur. Heart J. Case Rep.* 2022, 6, ytab007.
109. Wong, J.; Sharma, S.; Yao, J.V.; Aggarwal, A.; Grigg, L. COVID-19 mRNA vaccine (Comirnaty)-induced myocarditis. *Med. J. Aust.* 2022, 216, 122–123.
110. Ohnishi, M.; Tanaka, Y.; Nishida, S.; Sugimoto, T. Case report of acute myocarditis after administration of coronavirus disease 2019 vaccine in Japan. *Eur. Heart J. Case Rep.* 2022, 6, ytab534.
111. Aokawa, T.; Ogino, J.; Kita, Y.; Funayama, N.; Oyama-Manabe, N. Non-infectious endocarditis and myocarditis after COVID-19 mRNA vaccination. *Eur. Heart J. Case Rep.* 2022, 6, ytab533.
112. Chachar, T.S.; Yousuf, N.; Sulaibikh, L.; Abdulqader, F.; Alqahtani, M. First Report of Acute Myocarditis Post-Pfizer-BioNTech COVID-19 Vaccination in the Kingdom of Bahrain. *Cureus* 2021, 13, e20313.
113. Wu, B.; Mittal, N.; Adler, E.D.; Hong, K.N. Acute myocarditis after receiving first dose of BNT162b2 mRNA vaccine. *J. Cardiol. Cases* 2022, 25, 348–350.
114. Mimouni, H.; Bahouh, C.; Amaqdouf, S.; Laaribi, I.; Baddi, M.; Berichi, S.; Bkiyar, H.; Ismaili, N.; El Ouafi, N.; Housni, B. Cardiogenic shock revealing myocarditis after mRNA vaccination against covid-19: Case report and brief review for the first case in Morocco. *Ann. Med. Surg.* 2022, 74, 103210.
115. Ameratunga, R.; Woon, S.T.; Sheppard, M.N.; Garland, J.; Ondruschka, B.; Wong, C.X.; Stewart, R.A.H.; Tatley, M.; Stables, S.R.; Tse, R.D. First Identified Case of Fatal Fulminant Necrotizing Eosinophilic Myocarditis Following the Initial Dose of the Pfizer-BioNTech mRNA COVID-19 Vaccine (BNT162b2, Comirnaty): An Extremely Rare Idiosyncratic Hypersensitivity Re-action. *J. Clin. Immunol.* 2022, 42, 441–447.
116. Umei, T.C.; Kishino, Y.; Watanabe, K.; Shiraishi, Y.; Inohara, T.; Yuasa, S.; Fukuda, K. Recurrence of Myopericarditis Following mRNA COVID-19 Vaccination in a Male Adolescent. *CJC Open* 2022, 4, 350–352.
117. Nagasaka, T.; Koitabashi, N.; Ishibashi, Y.; Aihara, K.; Takama, N.; Ohyama, Y.; Yokoyama, T.; Kaneko, Y. Acute myocarditis associated with COVID-19 vaccination: A case report. *J. Cardiol. Cases* 2022, 25, 285–288.

118. Tinoco, M.; Leite, S.; Faria, B.; Cardoso, S.; Von Hafe, P.; Dias, G.; Cardoso, F.; Pereira, T.; Machado, I.; Lourenço, A. Peri-myocarditis Following COVID-19 Vaccination. *Clin. Med. Insights Cardiol.* 2021, 15, 11795468211056634.
119. Maeda, M.; Isawa, T.; Tada, N. Definite Acute Myocarditis after Coronavirus Disease 2019 mRNA Vaccination. *Circ. J.* 2022, 86, 724.
120. Kadwalwala, M.; Chadha, B.; Ortoleva, J.; Joyce, M. Multimodality imaging and histopathology in a young man presenting with fulminant lymphocytic myocarditis and cardiogenic shock after mRNA-1273 vaccination. *BMJ Case Rep.* 2021, 14, e246059.
121. Miqdad, M.A.; Nasser, H.; Alshehri, A.; Mourad, A.R. Acute Myocarditis Following the Administration of the Second BNT162b2 COVID-19 Vaccine Dose. *Cureus* 2021, 13, e18880.
122. Lim, Y.; Kim, M.C.; Kim, K.H.; Jeong, I.S.; Cho, Y.S.; Choi, Y.D.; Lee, J.E. Case Report: Acute Fulminant Myocarditis and Cardiogenic Shock after Messenger RNA Coronavirus Disease 2019 Vaccination Requiring Extracorporeal Cardiopulmonary Resuscitation. *Front. Cardiovasc. Med.* 2021, 8, 758996.
123. Azir, M.; Inman, B.; Webb, J.; Tannenbaum, L. STEMI Mimic: Focal Myocarditis in an Adolescent Patient after mRNA COVID-19 Vaccine. *J. Emerg. Med.* 2021, 61, e129–e132.
124. Kaneta, K.; Yokoi, K.; Jojima, K.; Kotooka, N.; Node, K. Young Male with Myocarditis Following mRNA-1273 Vaccination Against Coronavirus Disease-2019 (COVID-19). *Circ. J.* 2022, 86, 721.
125. Schmitt, P.; Demoulin, R.; Poyet, R.; Capilla, E.; Rohel, G.; Pons, F.; Jégo, C.; Sidibe, S.; Druelle, A.; Brocq, F.X.; et al. Acute Myocarditis after COVID-19 vaccination: A case report. *Rev. Med. Interne* 2021, 42, 797–800.
126. Habedank, D.; Lagast, A.; Novoa-Usme, M.; Atmowihardjo, I. A case of myocarditis in a 60-year-old man 48 h after mRNA vaccination against SARS-CoV2. *Clin. Res. Cardiol.* 2022, 111, 230–232.
127. Facetti, S.; Giralaldi, M.; Vecchi, A.L.; Rogiani, S.; Nassiaco, D. Miocardite acuta in giovane adulto due giorni dopo vaccino Pfizer [Acute myocarditis in a young adult two days after Pfizer vaccination]. *G. Ital. Cardiol.* 2021, 22, 891–893.
128. Riedel, P.G.; Sakai, V.F.; Toniasso, S.C.C.; Brum, M.C.B.; Fernandes, F.S.; Pereira, R.M.; Baldin, C.P.; Baldin, C.C.; Takahasi, A.Y.; Shiki, H.; et al. Heart failure secondary to myocarditis after SARS-CoV-2 reinfection: A case report. *Int. J. Infect. Dis.* 2021, 113, 175–177.
129. Choi, S.; Lee, S.; Seo, J.W.; Kim, M.J.; Jeon, Y.H.; Park, J.H.; Lee, J.K.; Yeo, N.S. Myocarditis-induced Sudden Death after BNT162b2 mRNA COVID-19 Vaccination in Korea: Case Report Focusing on Histopathological Findings. *J. Korean Med. Sci.* 2021, 36, e286.
130. Gautam, N.; Saluja, P.; Fudim, M.; Jambhekar, K.; Pandey, T.; Al'Aref, S. A Late Presentation of COVID-19 Vaccine-Induced Myocarditis. *Cureus* 2021, 13, e17890.
131. Kim, D.; Choi, J.H.; Jang, J.Y.; So, O.; Cho, E.; Choi, H.; Hong, K.S.; Park, K.T. A Case Report for Myopericarditis after BNT162b2 COVID-19 mRNA Vaccination in a Korean Young Male. *J. Korean Med. Sci.* 2021, 36, e277.
132. Sakaguchi, S.; Fujimoto, N.; Ichikawa, K.; Izumi, D.; Katsuta, K.; Takafuji, M.; Imanaka-Yoshida, K.; Dohi, K. Myopericarditis after COVID-19 mRNA Vaccination. *Circ. J.* 2022, 86, 472.
133. Nguyen, T.D.; Mall, G.; Westphal, J.G.; Weingärtner, O.; Möbius-Winkler, S.; Schulze, P.C. Acute myocarditis after COVID-19 vaccination with mRNA-1273 in a patient with former SARS-CoV-2 infection. *ESC Heart Fail.* 2021, 8, 4710–4714.
134. Tailor, P.D.; Feighery, A.M.; El-Sabawi, B.; Prasad, A. Case report: Acute myocarditis following the second dose of mRNA-1273 SARS-CoV-2 vaccine. *Eur. Heart J. Case Rep.* 2021, 5, ytab319.
135. Sulemankhil, I.; Abdelrahman, M.; Negi, S.I. Temporal Association between the COVID-19 Ad26.COV2.S Vaccine and Acute Myocarditis: A Case Report and Literature Review. *Cardiovasc. Revasc. Med.* 2022, 38, 117–123.
136. Kim, I.C.; Kim, H.; Lee, H.J.; Kim, J.Y.; Kim, J.Y. Cardiac Imaging of Acute Myocarditis Following COVID-19 mRNA Vaccination. *J. Korean Med. Sci.* 2021, 36, e229.
137. Patrignani, A.; Schicchi, N.; Calcagnoli, F.; Falchetti, E.; Ciampani, N.; Argalia, G.; Mariani, A. Acute myocarditis following Comirnaty vaccination in a healthy man with previous SARS-CoV-2 infection. *Radiol. Case Rep.* 2021, 16, 3321–3325.
138. Hasnie, A.A.; Hasnie, U.A.; Patel, N.; Aziz, M.U.; Xie, M.; Lloyd, S.G.; Prabhu, S.D. Perimyocarditis following first dose of the mRNA-1273 SARS-CoV-2 (Moderna) vaccine in a healthy young male: A case report. *BMC Cardiovasc. Disord.* 2021, 21, 375.
139. Isaak, A.; Feisst, A.; Luetkens, J.A. Myocarditis Following COVID-19 Vaccination. *Radiology* 2021, 301, E378–E379.
140. Williams, C.B.; Choi, J.I.; Hosseini, F.; Roberts, J.; Ramanathan, K.; Ong, K. Acute Myocarditis Following mRNA-1273 SARS-CoV-2 Vaccination. *CJC Open* 2021, 3, 1410–1412.
141. Nassar, M.; Nso, N.; Gonzalez, C.; Lakhdar, S.; Alshamam, M.; Elshafey, M.; Abdalazeem, Y.; Nyein, A.; Punzalan, B.; Durrance, R.J.; et al. COVID-19 vaccine-induced myocarditis: Case report with literature review. *Diabetes Metab. Syndr.* 2021, 15, 102205.
142. Cereda, A.; Conca, C.; Barbieri, L.; Ferrante, G.; Lucreziotti, S.; Guazzi, M.; Mafrici, A. Acute myocarditis after the second dose of SARS-CoV-2 vaccine: Serendipity or atypical causal relationship? *Anatol. J. Cardiol.* 2021, 25, 522–523.
143. Watkins, K.; Griffin, G.; Septaric, K.; Simon, E.L. Myocarditis after BNT162b2 vaccination in a healthy male. *Am. J. Emerg Med* 2021, 50, 815.e1–815.e2.
144. Deb, A.; Abdelmalek, J.; Iwuiji, K.; Nugent, K. Acute Myocardial Injury Following COVID-19 Vaccination: A Case Report and Review of Current Evidence from Vaccine Adverse Events Reporting System Database. *J. Prim. Care Community Health* 2021, 12, 21501327211029230.



145. Habib, M.B.; Hamamlyh, T.; Elyas, A.; Altermanini, M.; Elhassan, M. Acute myocarditis following administration of BNT162b2 vaccine. *IDCases* 2021, 25, e01197.
146. Minocha, P.K.; Better, D.; Singh, R.K.; Hoque, T. Recurrence of Acute Myocarditis Temporally Associated with Receipt of the mRNA Coronavirus Disease 2019 (COVID-19) Vaccine in a Male Adolescent. *J. Pediatr.* 2021, 238, 321–323.
147. Muthukumar, A.; Narasimhan, M.; Li, Q.Z.; Mahimainathan, L.; Hitto, I.; Fuda, F.; Batra, K.; Jiang, X.; Zhu, C.; Schoggins, J.; et al. In-Depth Evaluation of a Case of Presumed Myocarditis after the Second Dose of COVID-19 mRNA Vaccine. *Circulation* 2021, 144, 487–498.
148. McLean, K.; Johnson, T.J. Myopericarditis in a previously healthy adolescent male following COVID-19 vaccination: A case report. *Acad. Emerg. Med.* 2021, 28, 918–921.
149. Albert, E.; Aurigemma, G.; Saucedo, J.; Gerson, D.S. Myocarditis following COVID-19 vaccination. *Radiol. Case Rep.* 2021, 16, 2142–2145.
150. Bautista García, J.; Peña Ortega, P.; Bonilla Fernández, J.A.; Cárdenes León, A.; Ramírez Burgos, L.; Caballero Dorta, E. Mio-carditis aguda tras administración de vacuna BNT162b2 contra la COVID-19 [Acute myocarditis after administration of the BNT162b2 vaccine against COVID-19]. *Rev. Esp. Cardiol.* 2021, 74, 812–814.
